# Supplementary material
Source: PubMed Central journal article supplement (PMC6450775)

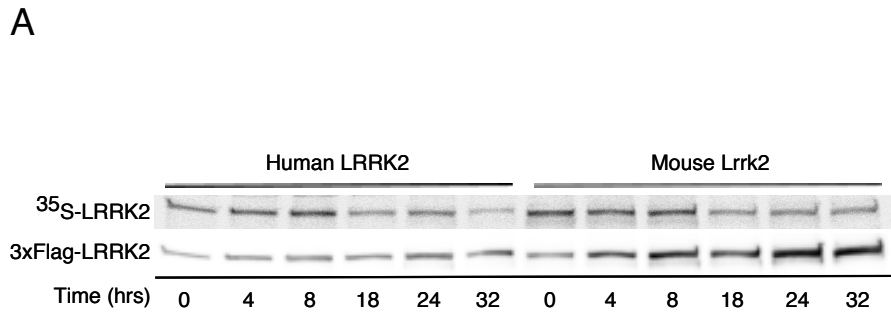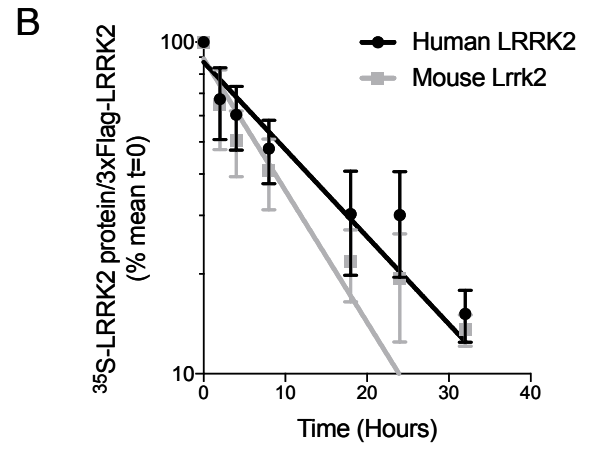

Langston et al., Figure S1

Supplement: NIHMS1524725-supplement-11064_2018_2650_MOESM1_ESM.pdf [file NIHMS1524725-supplement-11064_2018_2650_MOESM1_ESM.pdf]

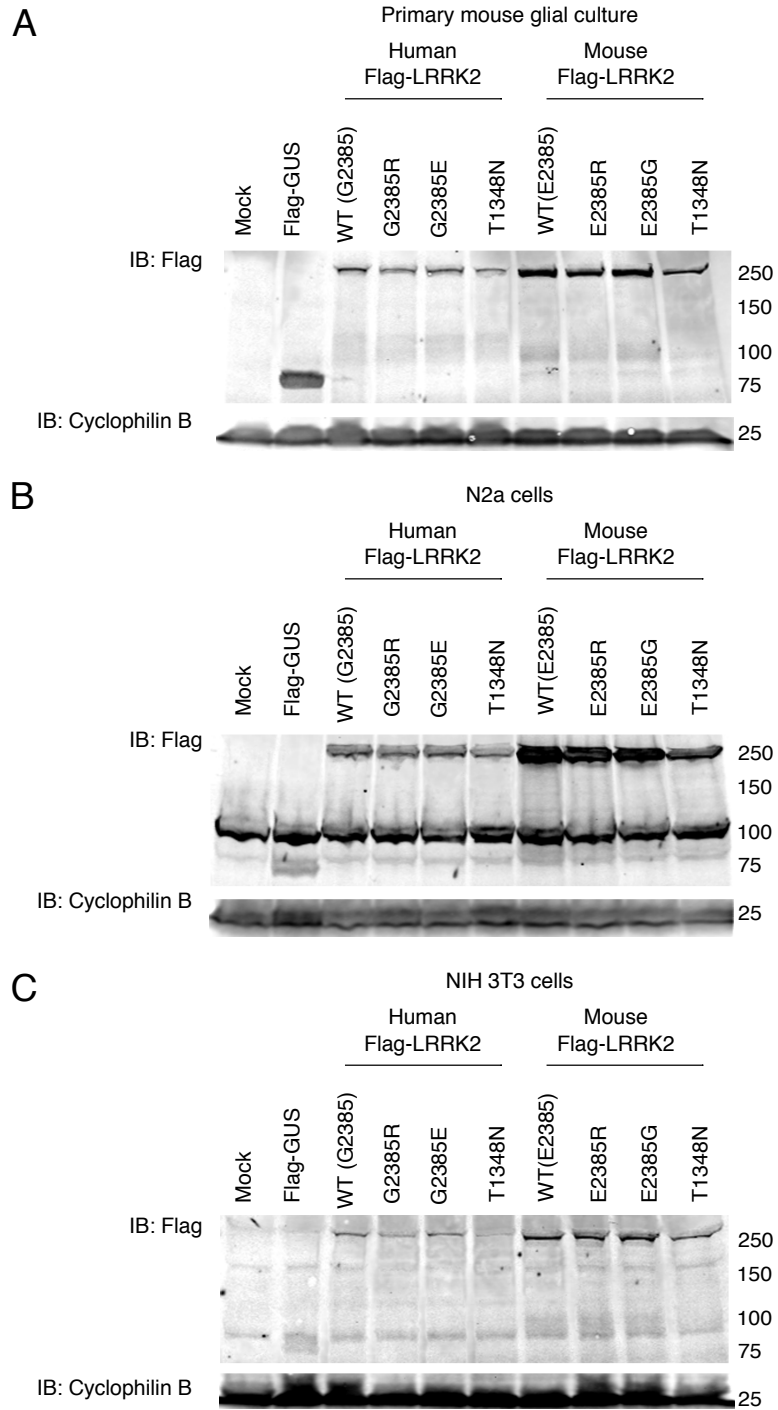

Langston et al., Figure S2

Supplement: NIHMS1524725-supplement-11064_2018_2650_MOESM2_ESM.pdf [file NIHMS1524725-supplement-11064_2018_2650_MOESM2_ESM.pdf]

**A**

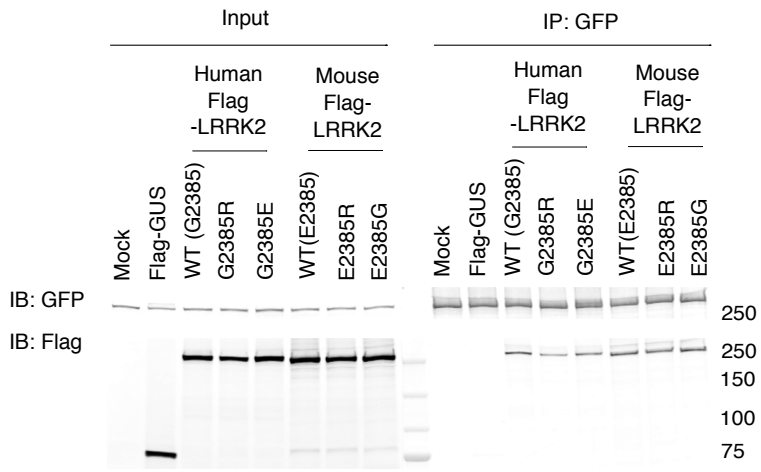

**B**

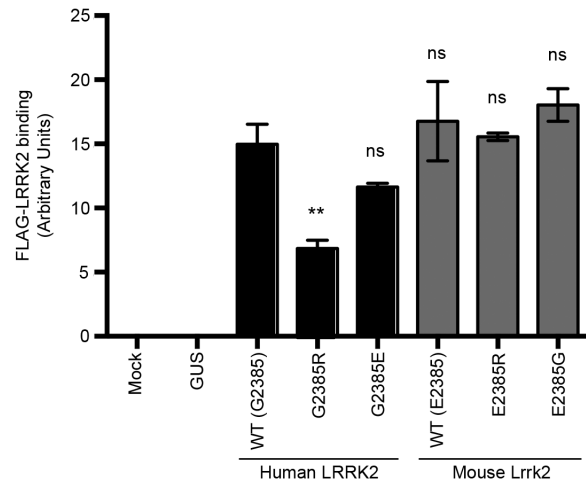

Langston et al., Figure S3

Supplement: NIHMS1524725-supplement-11064_2018_2650_MOESM3_ESM.pdf [file NIHMS1524725-supplement-11064_2018_2650_MOESM3_ESM.pdf]

A

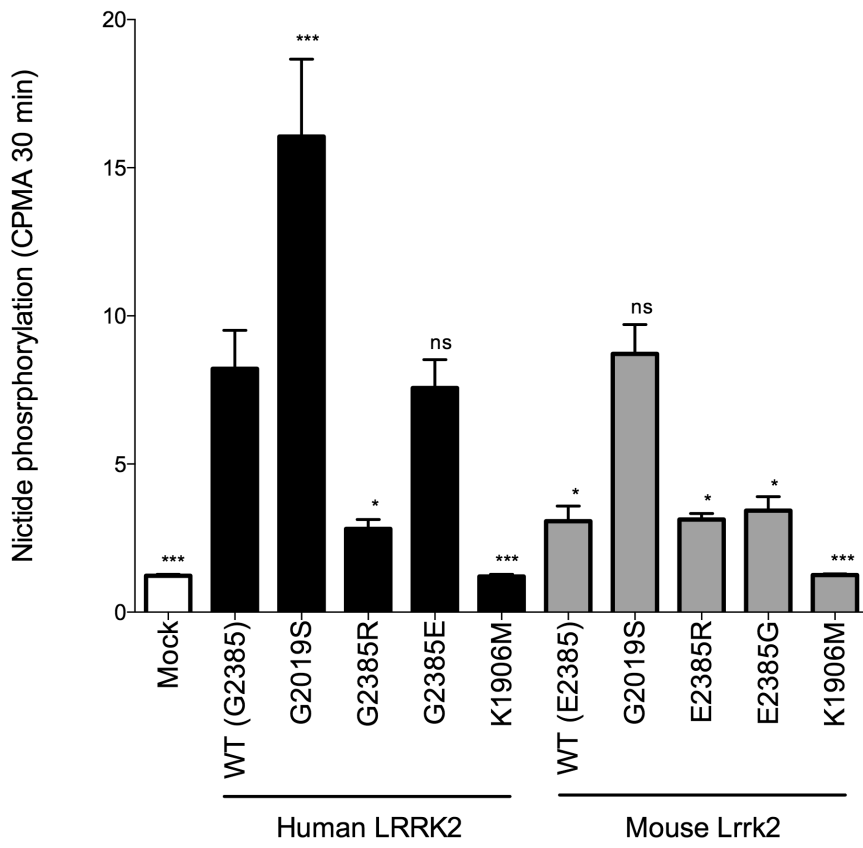

Langston et al., Figure S4

Supplement: NIHMS1524725-supplement-11064_2018_2650_MOESM4_ESM.pdf [file NIHMS1524725-supplement-11064_2018_2650_MOESM4_ESM.pdf]
